## CORRECTION

# Correction: What works in engaging communities? Prioritising nutrition interventions in Burkina Faso, Ghana and South Africa

The *PLOS ONE* Staff

## Notice of Republication

This article was republished on March 4, 2024, to correct an error in the author list. Aviva Tugendhaft, on behalf of the INPreP study group, was erroneously not included as the last author. The publisher apologizes for this error. Please download this article again to view the correct version. Both the originally published uncorrected article and the republished corrected article are provided here for reference.

## Supporting information

**S1 File. Originally published, uncorrected article.**  
(PDF)

**S2 File. Republished, corrected article.**  
(PDF)

## Reference

1. Watson D, Barker M, Boua PR, Chatio S, Compaoré A, Danis M, et al. (2023) What works in engaging communities? Prioritising nutrition interventions in Burkina Faso, Ghana and South Africa. *PLoS ONE* 18(12): e0294410. <https://doi.org/10.1371/journal.pone.0294410> PMID: 38091334

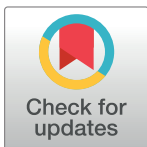

## OPEN ACCESS

**Citation:** The *PLOS ONE* Staff (2024) Correction: What works in engaging communities? Prioritising nutrition interventions in Burkina Faso, Ghana and South Africa. *PLoS ONE* 19(3): e0300859. <https://doi.org/10.1371/journal.pone.0300859>

**Published:** March 14, 2024

**Copyright:** © 2024 The *PLOS ONE* Staff. This is an open access article distributed under the terms of the [Creative Commons Attribution License](https://creativecommons.org/licenses/by/4.0/), which permits unrestricted use, distribution, and reproduction in any medium, provided the original author and source are credited.
